# Supplementary figures and images for: Enhanced Expression of Glycolytic Enzymes and Succinate Dehydrogenase Complex Flavoprotein Subunit A by Mesothelin Promotes Glycolysis and Mitochondrial Respiration in Myeloblasts of Acute Myeloid Leukemia
Source: MDPI journal article supplement (doi:10.3390/ijms25042140), 2024-02-10

Supplementary Figure S1

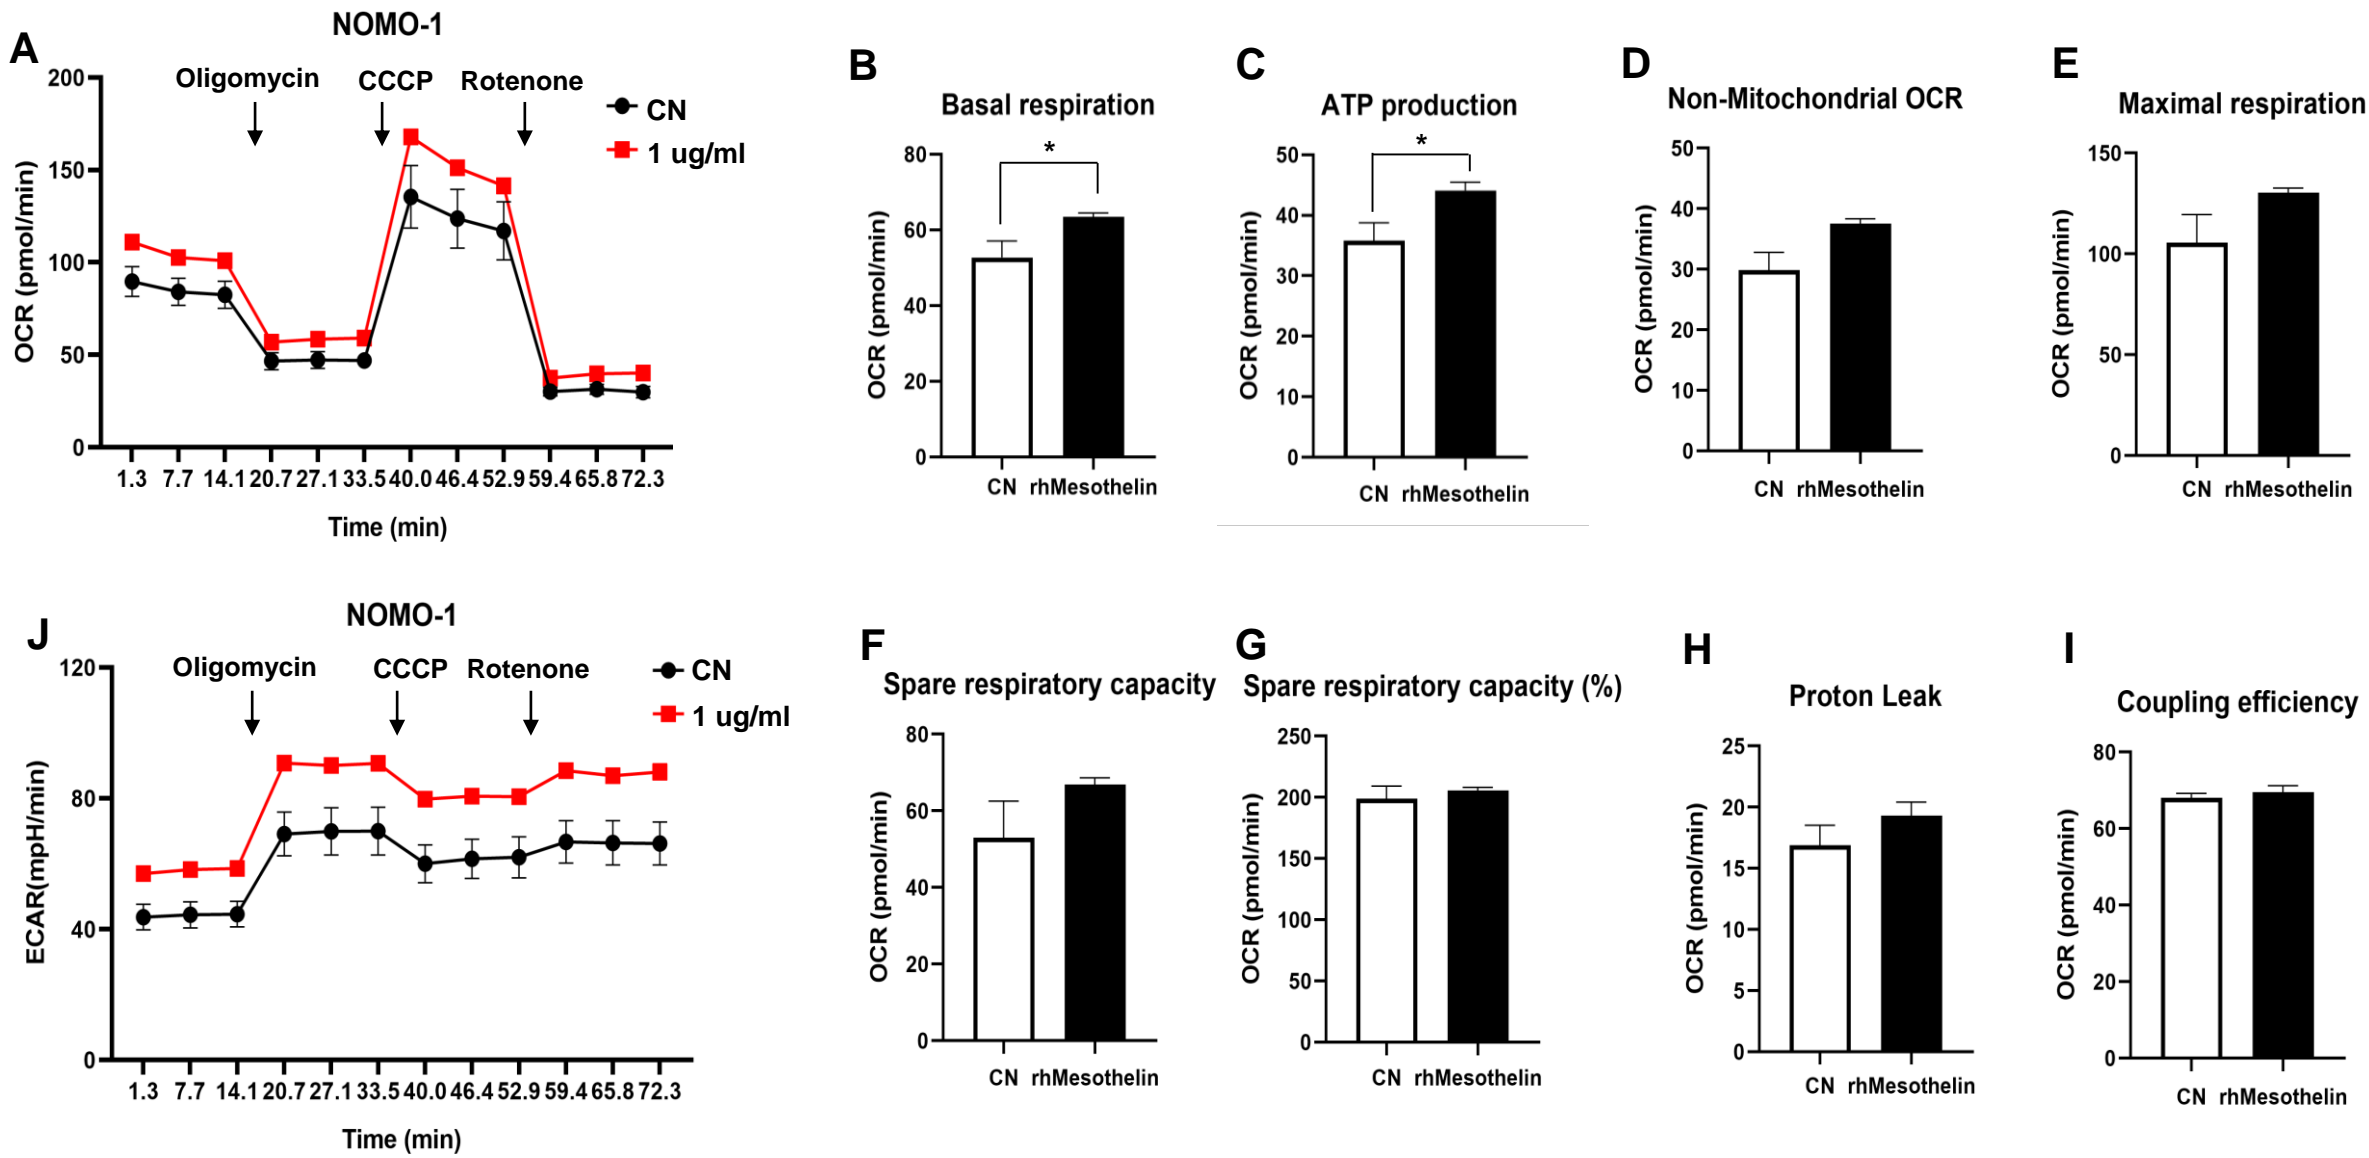

Supplementary Figure S2

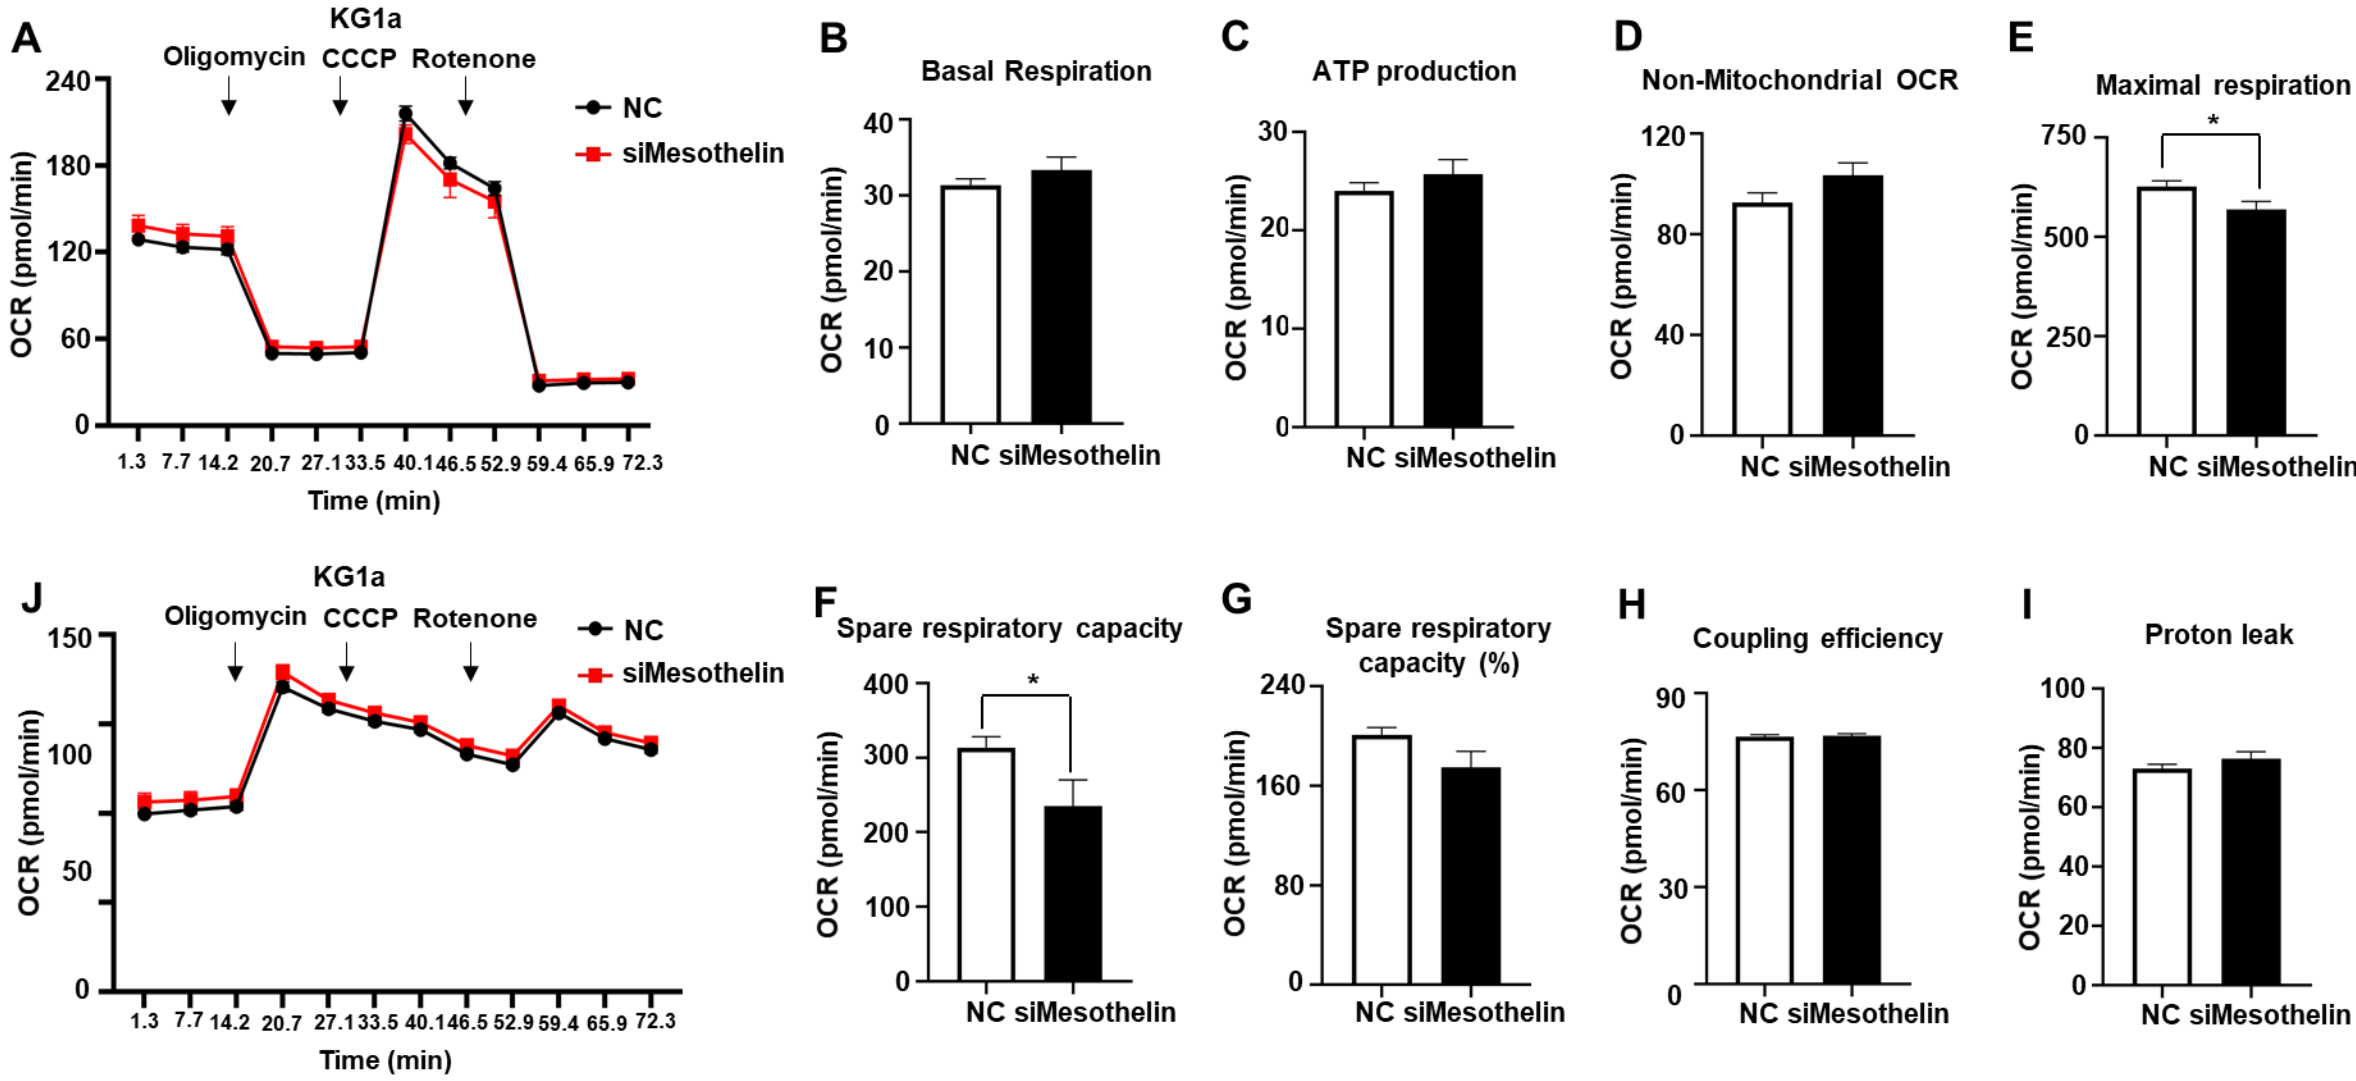

Supplementary Figure S3

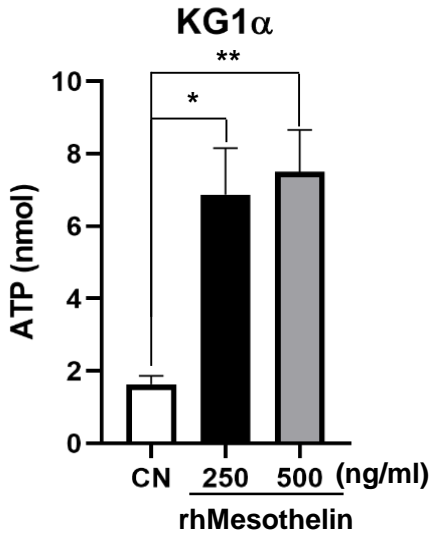

Supplement: s1 [file s1]
